# Supplementary material for: Serum Vitamin D Affected Type 2 Diabetes though Altering Lipid Profile and Modified the Effects of Testosterone on Diabetes Status
Source: PubMed Central journal article supplement (PMC7823697; doi:10.3390/nu13010090), 2020-12-30
Supplement: nutrients-13-00090-s001.pdf [file nutrients-13-00090-s001.pdf]

**Supplement Table 1** Associations of serum 25(OH)D<sub>3</sub>, 25(OH)D<sub>2</sub>, and total 25(OH)D levels with IFG and T2DM

|                      |                | Logistic regression, ORs (95% CIs) |                    |                       |                    |
|----------------------|----------------|------------------------------------|--------------------|-----------------------|--------------------|
|                      | Cases/Controls | Median (range)                     | Model 1            | Model 2               | Model 3            |
| <b>IFG</b>           |                |                                    |                    |                       |                    |
| 25(OH)D <sub>3</sub> |                |                                    |                    |                       |                    |
| Continuous           | 913/897        | 22.59 (5.30- 67.06)                | 0.98 (0.97, 0.99)* | 0.98 (0.97, 0.99)*    | 0.99 (0.97, 1.00)* |
| Q1                   | 251/186        | 16.00 (5.30- 18.55)                | Reference          | Reference             | Reference          |
| Q2                   | 234/240        | 20.51 (18.59- 22.62)               | 0.72 (0.56, 0.94)* | 0.73 (0.56, 0.95)*    | 0.77 (0.59, 1.01)  |
| Q3                   | 222/236        | 24.97 (22.64- 27.61)               | 0.70 (0.54, 0.91)* | 0.71 (0.54, 0.92)*    | 0.78 (0.59, 1.03)  |
| Q4                   | 206/235        | 31.99 (27.63- 67.06)               | 0.65 (0.50, 0.85)* | 0.66 (0.50, 0.86)*    | 0.75 (0.57, 1.00)* |
| <i>P</i> for trend   |                |                                    | 0.002              | 0.003                 | <0.001             |
| 25(OH)D <sub>2</sub> |                |                                    |                    |                       |                    |
| Continuous           | 913/897        | 6.98 (3.15- 37.61)                 | 0.85 (0.82, 0.88)* | 0.84 (0.81, 0.87)*    | 0.85 (0.82, 0.88)* |
| Q1                   | 242/153        | 4.86 (3.15- 5.45)                  | Reference          | Reference             | Reference          |
| Q2                   | 260/172        | 6.09 (5.47- 6.71)                  | 0.96 (0.72, 1.26)  | 0.954 (0.721, 1.263)  | 0.96 (0.72, 1.29)  |
| Q3                   | 239/236        | 7.45 (6.73- 8.44)                  | 0.64 (0.49, 0.84)* | 0.631 (0.480, 0.829)* | 0.63 (0.48, 0.84)* |
| Q4                   | 172/336        | 10.56 (8.46- 37.61)                | 0.32 (0.25, 0.43)* | 0.318 (0.241, 0.420)* | 0.33 (0.25, 0.44)* |
| <i>P</i> for trend   |                |                                    | <0.001             | <0.001                | <0.001             |
| 25(OH)D              |                |                                    |                    |                       |                    |
| Continuous           | 913/897        | 30.06 (8.45- 81.21)                | 0.96 (0.95, 0.97)* | 0.96 (0.95, 0.97)*    | 0.97 (0.96, 0.98)* |
| Q1                   | 256/181        | 22.56 (8.45- 25.25)                | Reference          | Reference             | Reference          |
| Q2                   | 250/211        | 27.84 (25.25- 30.02)               | 0.84 (0.64, 1.09)  | 0.84 (0.65, 1.10)     | 0.87 (0.67, 1.15)  |
| Q3                   | 251/255        | 32.92 (30.03- 36.66)               | 0.70 (0.54, 0.90)* | 0.70 (0.54, 0.91)*    | 0.76 (0.58, 0.99)* |
| Q4                   | 156/250        | 41.16 (36.67- 81.21)               | 0.44 (0.34, 0.58)* | 0.44 (0.33, 0.58)*    | 0.50 (0.37, 0.66)* |
| <i>P</i> for trend   |                |                                    | <0.001             | <0.001                | <0.001             |
| <b>T2DM</b>          |                |                                    |                    |                       |                    |
| 25(OH)D <sub>3</sub> |                |                                    |                    |                       |                    |
| Continuous           | 849/897        | 22.93 (5.30- 67.06)                | 0.99(0.98, 1.00)   | 0.99 (0.98, 1.00)     | 0.99 (0.98, 1.01)  |
| Q1                   | 226/186        | 15.96 (5.30- 18.55)                | Reference          | Reference             | Reference          |
| Q2                   | 190/240        | 20.68 (18.59- 22.62)               | 0.65 (0.50, 0.86)* | 0.66 (0.50, 0.87)*    | 0.68 (0.50, 0.92)* |
| Q3                   | 207/236        | 25.18 (22.64- 27.61)               | 0.72 (0.55, 0.95)* | 0.72 (0.55, 0.95)*    | 0.71 (0.52, 0.95)* |
| Q4                   | 226/235        | 31.99 (27.63- 67.06)               | 0.79 (0.61, 1.03)  | 0.80 (0.61, 1.04)     | 0.86 (0.64, 1.17)  |
| <i>P</i> for trend   |                |                                    | 0.193              | 0.191                 | 0.421              |
| 25(OH)D <sub>2</sub> |                |                                    |                    |                       |                    |
| Continuous           | 849/897        | 6.87 (3.15- 37.61)                 | 0.85 (0.81, 0.88)* | 0.84 (0.81, 0.88)*    | 0.84 (0.81, 0.88)* |
| Q1                   | 256/153        | 4.86 (3.15- 5.46)                  | Reference          | Reference             | Reference          |
| Q2                   | 245/172        | 6.09 (5.47- 6.71)                  | 0.85 (0.64, 1.13)  | 0.84 (0.64, 1.12)     | 0.93 (0.68, 1.26)  |
| Q3                   | 191/236        | 7.50 (6.73- 8.44)                  | 0.48 (0.37, 0.64)* | 0.47 (0.36, 0.63)*    | 0.47 (0.35, 0.64)* |

|                    |         |                      |                    |                    |                    |
|--------------------|---------|----------------------|--------------------|--------------------|--------------------|
| Q4                 | 157/336 | 10.56 (8.48- 37.61)  | 0.28 (0.21, 0.37)* | 0.28 (0.21, 0.36)* | 0.27 (0.20, 0.37)* |
| <i>P</i> for trend |         |                      | <0.001             | <0.001             | <0.001             |
| 25(OH)D            |         |                      |                    |                    |                    |
| Continuous         | 849/897 | 30.52 (8.45- 81.21)  | 0.97 (0.96, 0.98)* | 0.97 (0.96, 0.98)* | 0.97 (0.96, 0.99)* |
| Q1                 | 226/181 | 22.45 (8.45- 25.25)  | Reference          | Reference          | Reference          |
| Q2                 | 205/211 | 27.76 (25.25- 30.02) | 0.78 (0.59, 1.02)  | 0.78 (0.59, 1.03)  | 0.77 (0.57, 1.04)  |
| Q3                 | 240/255 | 32.75 (30.03- 36.66) | 0.75 (0.58, 0.98)* | 0.76 (0.58, 0.99)* | 0.74 (0.55, 0.99)* |
| Q4                 | 178/250 | 41.47 (36.67- 81.21) | 0.57 (0.43, 0.75)* | 0.57 (0.43, 0.75)* | 0.61 (0.45, 0.83)* |
| <i>P</i> for trend |         |                      | <0.001             | <0.001             | 0.002              |

Model 1: no adjust. Model 2: adjusted for smoking status, alcohol intake, physical activity, average monthly individual income, level of education. Model 3: model 2+ BMI, SBP, PP, TC, TG, HDL-C, LDL-C and family history of T2DM. \**P*<0.05. Abbreviations: IFG, impaired fasting glucose; T2DM, type 2 diabetes mellitus; *OR*, odds ratio; 95%*CI*: 95% confidence interval; Q1, the first/ lowest quartile; Q2, the second quartile; Q3, the third quartile; Q4, the fourth/highest quartile.

**Supplement Table 2** The adjusted  $\beta$  coefficients (95% *CI*s) in markers of glucose metabolism associated with serum 25(OH)D<sub>3</sub>, 25(OH)D<sub>2</sub>, 25(OH)D concentrations

| Variables                  | Adjusted $\beta$ coefficients (95% <i>CI</i> s) |                       |                       |                       |                       |
|----------------------------|-------------------------------------------------|-----------------------|-----------------------|-----------------------|-----------------------|
|                            | FPG                                             | HbA1c                 | INS                   | Ln-HOMA2-IR           | Ln-HOMA2- $\beta$     |
| <b>25(OH)D<sub>3</sub></b> |                                                 |                       |                       |                       |                       |
| Continuous                 | 0.01 (-0.00, 0.03)                              | 0.00 (-0.01, 0.01)    | -0.04 (-0.07, -0.01)* | -0.00 (-0.01, -0.00)* | -0.00 (-0.01, -0.00)* |
| Q1                         | Reference                                       | Reference             | Reference             | Reference             | Reference             |
| Q2                         | -0.07 (-0.34, 0.19)                             | -0.09 (-0.25, 0.07)   | 0.06 (-0.53, 0.66)    | 0.01 (-0.04, 0.05)    | 0.04 (-0.03, 0.10)    |
| Q3                         | 0.17 (-0.09, 0.44)                              | 0.01 (-0.16, 0.17)    | -0.25 (-0.84, 0.34)   | -0.00 (-0.05, 0.04)   | -0.03 (-0.09, 0.04)   |
| Q4                         | 0.22 (-0.05, 0.49)                              | -0.00 (-0.17, 0.17)   | -0.66 (-1.26, -0.06)* | -0.04 (-0.09, 0.00)   | -0.07 (-0.13, -0.01)* |
| <b>25(OH)D<sub>2</sub></b> |                                                 |                       |                       |                       |                       |
| Continuous                 | -0.11 (-0.14, -0.08)*                           | -0.07 (-0.09, -0.05)* | -0.08 (-0.14, -0.01)* | -0.01 (-0.01, -0.00)* | 0.02 (0.02, 0.03)*    |
| Q1                         | Reference                                       | Reference             | Reference             | Reference             | Reference             |
| Q2                         | -0.07 (-0.34, 0.19)*                            | -0.01 (-0.17, 0.15)   | -0.40 (-0.99, 0.19)   | -0.04 (-0.08, 0.01)   | 0.00 (-0.06, 0.07)    |
| Q3                         | -0.63 (-0.89, -0.36)*                           | -0.33 (-0.49, -0.16)* | -0.86 (-1.46, -0.27)* | -0.08 (-0.12, -0.03)* | 0.10 (0.03, 0.16)*    |
| Q4                         | -0.86 (-1.13, -0.60)*                           | -0.52 (-0.69, -0.36)* | -0.50 (-1.09, 0.10)   | -0.06 (-0.10, -0.01)* | 0.18 (0.12, 0.25)*    |
| <b>25(OH)D</b>             |                                                 |                       |                       |                       |                       |
| Continuous                 | -0.01 (-0.02, 0.01)                             | -0.01 (-0.02, -0.00)* | -0.04 (-0.07, -0.02)* | -0.00 (-0.01, -0.00)* | 0.00 (-0.00, 0.00)    |
| Q1                         | Reference                                       | Reference             | Reference             | Reference             | Reference             |
| Q2                         | -0.02 (-0.28, 0.25)                             | -0.08 (-0.24, 0.09)   | 0.28 (-0.31, 0.87)    | 0.02 (-0.02, 0.07)    | 0.04 (-0.03, 0.10)    |
| Q3                         | 0.12 (-0.14, 0.38)                              | 0.02 (-0.14, 0.18)    | -0.45 (-1.03, 0.12)   | -0.02 (-0.07, 0.02)   | -0.03 (-0.09, 0.03)   |
| Q4                         | -0.06 (-0.34, 0.22)                             | -0.19 (-0.36, -0.02)* | -0.56 (-1.17, 0.06)   | -0.04 (-0.09, 0.01)   | 0.00 (-0.06, 0.07)    |

Adjusted for alcohol intake, smoking status, physical activity, average monthly individual income, level of education, BMI, SBP, PP, TC, TG, HDL-C, LDL-C and family history of T2DM. \* $P < 0.05$ . Abbreviation: Ln-, natural log - transformed; FPG, fasting plasm glucose; HbA1c, glycosylated hemoglobin; INS, insulin; *OR*, odds ratio; 95%*CI*: 95% confidence interval; Q1, the first/ lowest quartile; Q2, the second quartile; Q3, the third quartile; Q4, the fourth/highest quartile.

**Supplement Table 3** Associations of 25(OH)D<sub>3</sub>, 25(OH)D<sub>2</sub>, total 25(OH)D (ng/ml) levels with IFG and T2DM in subgroups

| Groups                  | Logistic regression, ORs (95% CIs) |                      |                    |
|-------------------------|------------------------------------|----------------------|--------------------|
|                         | 25(OH)D <sub>3</sub>               | 25(OH)D <sub>2</sub> | 25(OH)D            |
| <b>IFG</b>              |                                    |                      |                    |
| Age<60y                 | 0.98 (0.96, 1.00)                  | 0.85 (0.80, 0.90)*   | 0.96 (0.94, 0.98)* |
| Age≥60y                 | 0.98 (0.97, 1.00)                  | 0.84 (0.80, 0.89)*   | 0.97 (0.95, 0.98)* |
| Male                    | 0.97 (0.95, 0.99)*                 | 0.82 (0.77, 0.88)*   | 0.95 (0.93, 0.97)* |
| Female                  | 0.99 (0.97, 1.01)                  | 0.86 (0.82, 0.90)*   | 0.98 (0.96, 0.99)* |
| BMI<24kg/m <sup>2</sup> | 0.98 (0.96, 1.00)*                 | 0.82 (0.77, 0.86)*   | 0.96 (0.95, 0.98)* |
| BMI≥24kg/m <sup>2</sup> | 0.99 (0.97, 1.01)                  | 0.87 (0.83, 0.92)*   | 0.97 (0.95, 0.99)* |
| No Hypertension         | 0.99 (0.98, 1.01)                  | 0.85 (0.81, 0.89)*   | 0.97 (0.96, 0.99)* |
| Hypertension            | 0.97 (0.94, 1.00)*                 | 0.83 (0.77, 0.90)*   | 0.95 (0.92, 0.97)* |
| No Dyslipidemia         | 0.99 (0.97, 1.00)                  | 0.85 (0.81, 0.89)*   | 0.97 (0.96, 0.99)* |
| Dyslipidemia            | 0.98 (0.95, 1.00)                  | 0.83 (0.78, 0.88)*   | 0.95 (0.93, 0.98)* |
| <b>T2DM</b>             |                                    |                      |                    |
| Age<60y                 | 0.99 (0.97, 1.02)                  | 0.83 (0.78, 0.88)*   | 0.97 (0.95, 0.99)* |
| Age≥60y                 | 0.99 (0.97, 1.01)                  | 0.85 (0.81, 0.90)*   | 0.97 (0.96, 0.99)* |
| Male                    | 0.98 (0.96, 1.01)                  | 0.82 (0.77, 0.88)*   | 0.96 (0.94, 0.98)* |
| Female                  | 1.00 (0.98, 1.02)                  | 0.86 (0.82, 0.91)*   | 0.98 (0.97, 1.00)  |
| BMI<24kg/m <sup>2</sup> | 0.98 (0.95, 1.00)*                 | 0.77 (0.72, 0.83)*   | 0.95 (0.94, 0.97)* |
| BMI≥24kg/m <sup>2</sup> | 1.01 (0.99, 1.03)                  | 0.89 (0.84, 0.93)*   | 0.99 (0.97, 1.01)  |
| No Hypertension         | 0.99 (0.98, 1.01)                  | 0.86 (0.82, 0.90)*   | 0.98 (0.96, 0.99)* |
| Hypertension            | 0.99 (0.96, 1.02)                  | 0.81 (0.75, 0.88)*   | 0.97 (0.94, 0.99)* |
| No Dyslipidemia         | 1.00 (0.98, 1.02)                  | 0.86 (0.81, 0.91)*   | 0.98 (0.97, 1.00)  |
| Dyslipidemia            | 0.99 (0.96, 1.01)                  | 0.82 (0.78, 0.87)*   | 0.96 (0.94, 0.98)* |

Adjusted for smoking status, alcohol intake, physical activity, average monthly individual income, level of education, SBP, PP, TC, TG, HDL-C, LDL-C and family history of T2DM. \**P*<0.05. Abbreviations: IFG, impaired fasting glucose; T2DM, type 2 diabetes mellitus; *OR*, odds ratio; 95%*CI*: 95% confidence interval.

**Supplementary Table 4** The associations between vitamin D and lipid profile

|                      | Adjusted $\beta$ coefficients (95% CIs) |                             |                             |                           |
|----------------------|-----------------------------------------|-----------------------------|-----------------------------|---------------------------|
|                      | TC                                      | TG                          | LDL-C                       | HDL-C                     |
| <b>IFG</b>           |                                         |                             |                             |                           |
| <b>Male</b>          |                                         |                             |                             |                           |
| 25(OH)D <sub>3</sub> | -0.0013 (-0.0092, 0.0066)               | -0.0061 (-0.0172, 0.0049)   | 0.0000 (-0.0072, 0.0071)    | 0.0015 (-0.0019, 0.0050)  |
| 25(OH)D <sub>2</sub> | -0.0171 (-0.0333, -0.0008)*             | 0.0118 (-0.0285, 0.0521)    | -0.0181 (-0.0334, -0.0027)* | 0.0022 (-0.0051, 0.0095)  |
| 25(OH)D              | -0.0037 (-0.0101, 0.0027)               | -0.0026 (-0.0140, 0.0088)   | -0.0029 (-0.0091, 0.0033)   | 0.0015 (-0.0015, 0.0044)  |
| <b>Female</b>        |                                         |                             |                             |                           |
| 25(OH)D <sub>3</sub> | -0.0084 (-0.0159, -0.0008)*             | -0.0128 (-0.0208, -0.0047)* | 0.0006 (-0.0064, 0.0076)    | 0.0002 (-0.0028, 0.0031)  |
| 25(OH)D <sub>2</sub> | -0.0334 (-0.0511, -0.0157)*             | -0.0185 (-0.0363, -0.0007)* | -0.0253 (-0.0412, -0.0094)* | -0.0016 (-0.0094, 0.0061) |
| 25(OH)D              | -0.0109 (-0.0172, -0.0046)*             | -0.0121 (-0.0188, -0.0054)* | -0.0031 (-0.0091, 0.0029)   | -0.0001 (-0.0027, 0.0025) |
| <b>T2DM</b>          |                                         |                             |                             |                           |
| <b>Male</b>          |                                         |                             |                             |                           |
| 25(OH)D <sub>3</sub> | -0.0034 (-0.0115, 0.0047)               | -0.0198 (-0.0327, -0.0069)* | 0.0016 (-0.0060, 0.0091)    | 0.0042 (0.0010, 0.0074)*  |
| 25(OH)D <sub>2</sub> | -0.0155 (-0.0322, 0.0011)               | -0.0064 (-0.0490, 0.0362)   | -0.0140 (-0.0294, 0.0013)   | 0.0069 (-0.0001, 0.0138)  |
| 25(OH)D              | -0.0049 (-0.0115, 0.0016)               | -0.0150 (-0.0282, -0.0018)* | -0.0012 (-0.0075, 0.0051)   | 0.0041 (0.0014, 0.0068)*  |
| <b>Female</b>        |                                         |                             |                             |                           |
| 25(OH)D <sub>3</sub> | -0.0077 (-0.0166, 0.0011)               | -0.0023 (-0.0147, 0.0100)   | -0.0088 (-0.0167, -0.0010)* | 0.0007 (-0.0023, 0.0036)  |
| 25(OH)D <sub>2</sub> | -0.0269 (-0.0456, -0.0082)*             | -0.0324 (-0.0553, -0.0095)* | -0.0082 (-0.0243, 0.0080)   | 0.0048 (-0.0026, 0.0123)  |
| 25(OH)D              | -0.0093 (-0.0167, -0.0019)*             | -0.0062 (-0.0161, 0.0036)   | -0.0074 (-0.0139, -0.0010)* | 0.0012 (-0.0013, 0.0036)  |

Adjusted for alcohol intake, smoking status, physical activity, average monthly individual income, level of education, BMI, SBP, PP, and family history of T2DM. \* $P < 0.05$ .

Abbreviation: TC, total cholesterol; TG, triglyceride; LDL-C, low - density lipoprotein cholesterol; HDL-C, high - density lipoprotein cholesterol;  
95%*CI*: 95% confidence interval.

**Supplement Table 5** The associations between testosterone and T2DM in premenopause and post-menopause females

| T2DM    | Logistic regression, <i>ORs</i> (95% <i>CI</i> s) |                        |
|---------|---------------------------------------------------|------------------------|
|         | Premenopause females                              | Post-menopause females |
| Model 1 | 1.449 (1.031, 2.036)*                             | 1.547 (1.332, 1.797)*  |
| Model 2 | 1.512 (1.061, 2.154)*                             | 1.534 (1.319, 1.784)*  |
| Model 3 | 1.651 (1.112, 2.453)*                             | 1.613 (1.362, 1.910)*  |

Model 1: no adjust. Model 2: adjusted for smoking status, alcohol intake, physical activity, average monthly individual income and level of education. Model 3: model 2+ BMI, SBP, PP, TC, TG, HDL-C, LDL-C and family history of T2DM. \* $P < 0.05$ . Abbreviations: T2DM, type 2 diabetes mellitus; *OR*, odds ratio; 95%*CI*: 95% confidence interval.

**Supplementary Table 6** Mediation analysis of the relationships between 25(OH)D<sub>3</sub>, 25(OH)D<sub>2</sub> or 25(OH)D and IFG or T2DM by TC or TG in males and females

| Parameters                     | TC                          |                             | TG                          |                             |
|--------------------------------|-----------------------------|-----------------------------|-----------------------------|-----------------------------|
|                                | Male                        | Female                      | Male                        | Female                      |
| <b>IFG</b>                     |                             |                             |                             |                             |
| <b>25(OH)D<sub>3</sub></b>     |                             |                             |                             |                             |
| Total effect                   | -0.0314 (-0.0545, -0.0080)* | -0.0130 (-0.0305, -0.0052)* | -0.0314 (-0.0545, -0.0080)* | -0.0130 (-0.0305, -0.0052)* |
| Indirect effect-path <i>ab</i> | -0.0006 (-0.0043, 0.0028)   | -0.0030 (-0.0065, -0.0005)* | -0.0009 (-0.0039, 0.0004)   | -0.0017 (-0.0044, -0.0002)* |
| Path <i>a</i>                  | -0.0013 (-0.0092, 0.0066)   | -0.0084 (-0.0159, -0.0008)* | -0.0061 (-0.0172, 0.0049)   | -0.0128 (-0.0208, -0.0047)* |
| Path <i>b</i>                  | 0.4142 (0.2025, 0.6260)*    | 0.3539 (0.2093, 0.4986)*    | 0.1390 (-0.0233, 0.3014)    | 0.1362 (0.0155, 0.2569)*    |
| Direct effect-path <i>c'</i>   | -0.0318 (-0.0533, -0.0103)* | -0.0102 (-0.0286, 0.0083)   | -0.0305 (-0.0519, -0.0092)* | -0.0110 (-0.0293, 0.0074)   |
| PE*                            | —                           | — <sub>b</sub>              | —                           | — <sub>b</sub>              |
| <b>25(OH)D<sub>2</sub></b>     |                             |                             |                             |                             |
| Total effect                   | -0.1951 (-0.2734, -0.1372)* | -0.1643 (-0.2211, -0.1153)* | -0.1951 (-0.2734, -0.1372)* | -0.1643 (-0.2211, -0.1153)* |
| Indirect effect-path <i>ab</i> | -0.0065 (-0.0156, -0.0007)* | -0.0105 (-0.0202, -0.0042)* | 0.0021 (-0.0031, 0.0141)    | -0.0023 (-0.0075, -0.0001)* |
| Path <i>a</i>                  | -0.0171 (-0.0333, -0.0008)* | -0.0334 (-0.0511, -0.0157)* | 0.0118 (-0.0285, 0.0521)    | -0.0185 (-0.0363, -0.0007)* |
| Path <i>b</i>                  | 0.3809 (0.1626, 0.5993)*    | 0.3151 (0.1674, 0.4629)*    | 0.1744 (0.0030, 0.3458)*    | 0.1223 (-0.0003, 0.2450)    |
| Direct effect-path <i>c'</i>   | -0.1906 (-0.2514, -0.1298)* | -0.1532 (-0.2018, -0.1046)* | -0.1935 (-0.2540, -0.1330)* | -0.1620 (-0.2104, -0.1135)* |
| PE*                            | 3.33%                       | 6.39%                       | —                           | —                           |
| <b>25(OH)D</b>                 |                             |                             |                             |                             |
| Total effect                   | -0.0493 (-0.0727, -0.0314)* | -0.0312 (-0.0486, -0.0157)* | -0.0493 (-0.0727, -0.0314)* | -0.0312 (-0.0486, -0.0157)* |
| Indirect effect-path <i>ab</i> | -0.0015 (-0.0051, 0.0010)   | -0.0037 (-0.0069, -0.0015)* | -0.0004 (-0.0030, 0.0012)   | -0.0015 (-0.0038, -0.0001)* |
| Path <i>a</i>                  | -0.0037 (-0.0101, 0.0027)   | -0.0109 (-0.0172, -0.0046)* | -0.0026 (-0.0140, 0.0088)   | -0.0121 (-0.0188, -0.0054)* |



|                              |                             |                             |                             |                             |
|------------------------------|-----------------------------|-----------------------------|-----------------------------|-----------------------------|
| Path <i>b</i>                | 0.4067 (0.1923, 0.6210)*    | 0.3388 (0.1933, 0.4844)*    | 0.1449 (-0.0209, 0.3107)    | 0.1231 (0.0021, 0.2442)*    |
| Direct effect-path <i>c'</i> | -0.0490 (-0.0683, -0.0297)* | -0.0278 (-0.0442, -0.0114)* | -0.0488 (-0.0679, -0.0296)* | -0.0295 (-0.0458, -0.0132)* |
| PE*                          | —                           | 11.86%                      | —                           | 4.81%                       |

### T2DM

#### 25(OH)D<sub>3</sub>

|                                |                           |                           |                             |                           |
|--------------------------------|---------------------------|---------------------------|-----------------------------|---------------------------|
| Total effect                   | -0.0192 (-0.0417, 0.0040) | -0.0019 (-0.0204, 0.0174) | -0.0192 (-0.0417, 0.0040)   | -0.0019 (-0.0204, 0.0174) |
| Indirect effect-path <i>ab</i> | -0.0008 (-0.0040, 0.0009) | -0.0030 (-0.0070, 0.0003) | -0.0074 (-0.0146, -0.0024)* | -0.0010 (-0.0063, 0.0046) |
| Path <i>a</i>                  | -0.0034 (-0.0115, 0.0047) | -0.0077 (-0.0166, 0.0011) | -0.0198 (-0.0327, -0.0069)* | -0.0023 (-0.0147, 0.0100) |
| Path <i>b</i>                  | 0.2409 (0.0425, 0.4394)*  | 0.3822 (0.2417, 0.5226)*  | 0.3738 (0.2120, 0.5355)*    | 0.4425 (0.3179, 0.5672)*  |
| Direct effect-path <i>c'</i>   | -0.0189 (-0.0414, 0.0036) | 0.0015 (-0.0182, 0.0211)  | -0.0141 (-0.0369, 0.0087)   | -0.0007 (-0.0208, 0.0193) |
| PE*                            | —                         | —                         | —                           | —                         |

#### 25(OH)D<sub>2</sub>

|                                |                             |                             |                             |                             |
|--------------------------------|-----------------------------|-----------------------------|-----------------------------|-----------------------------|
| Total effect                   | -0.2017 (-0.2960, -0.1324)* | -0.1786 (-0.2559, -0.1214)* | -0.2017 (-0.2960, -0.1324)* | -0.1786 (-0.2559, -0.1214)* |
| Indirect effect-path <i>ab</i> | -0.0034 (-0.0110, 0.0000)   | -0.0097 (-0.0195, -0.0030)* | -0.0025 (-0.0190, 0.0142)   | -0.0138 (-0.0258, -0.0041)* |
| Path <i>a</i>                  | -0.0155 (-0.0322, 0.0011)   | -0.0269 (-0.0456, -0.0082)* | -0.0064 (-0.0490, 0.0362)   | -0.0324 (-0.0553, -0.0095)* |
| Path <i>b</i>                  | 0.2188 (0.0140, 0.4236)*    | 0.3611 (0.2171, 0.5051)*    | 0.3996 (0.2259, 0.5733)*    | 0.4270 (0.3003, 0.5538)*    |
| Direct effect-path <i>c'</i>   | -0.2006 (-0.2656, -0.1357)* | -0.1702 (-0.2223, -0.1181)* | -0.2022 (-0.2683, -0.1361)* | -0.1676 (-0.2198, -0.1154)* |
| PE*                            | —                           | 5.43%                       | —                           | 7.73%                       |

#### 25(OH)D

|                                |                             |                             |                             |                             |
|--------------------------------|-----------------------------|-----------------------------|-----------------------------|-----------------------------|
| Total effect                   | -0.0399 (-0.0619, -0.0213)* | -0.0238 (-0.0418, -0.0061)* | -0.0399 (-0.0619, -0.0213)* | -0.0238 (-0.0418, -0.0061)* |
| Indirect effect-path <i>ab</i> | -0.0012 (-0.0040, 0.0002)   | -0.0035 (-0.0071, -0.0008)* | -0.0055 (-0.0122, -0.0009)* | -0.0027 (-0.0070, 0.0017)   |
| Path <i>a</i>                  | -0.0049 (-0.0115, 0.0016)   | -0.0093 (-0.0167, -0.0019)* | -0.0150 (-0.0282, -0.0018)* | -0.0062 (-0.0161, 0.0036)   |
| Path <i>b</i>                  | 0.2351 (0.0346, 0.4356)*    | 0.3712 (0.2302, 0.5123)*    | 0.3658 (0.2026, 0.5289)*    | 0.4381 (0.3136, 0.5627)*    |

|                       |                             |                             |                             |                             |
|-----------------------|-----------------------------|-----------------------------|-----------------------------|-----------------------------|
| Direct effect-path c' | -0.0394 (-0.0589, -0.0199)* | -0.0205 (-0.0374, -0.0036)* | -0.0369 (-0.0565, -0.0172)* | -0.0221 (-0.0393, -0.0049)* |
| PE*                   | —                           | 14.71%                      | 13.78%                      | —                           |

PE\*=Indirect effect/Total effect. b Fully mediated. Adjusted for alcohol intake, smoking status, physical activity, average monthly individual income, level of education, BMI, SBP, PP, and family history of T2DM. \*P<0.05. Abbreviations: IFG, impaired fasting glucose; T2DM, type 2 diabetes mellitus; 95%CI: 95% confidence interval.

**Supplementary Table 7** Mediation analysis of the relationships between 25(OH)D<sub>3</sub>, 25(OH)D<sub>2</sub> or 25(OH)D and IFG or T2DM by LDL-C or HDL-C in males and females

| Parameters                     | LDL-C                       |                             | HDL-C                       |                             |
|--------------------------------|-----------------------------|-----------------------------|-----------------------------|-----------------------------|
|                                | Male                        | Female                      | Male                        | Female                      |
| <b>IFG</b>                     |                             |                             |                             |                             |
| <b>25(OH)D<sub>3</sub></b>     |                             |                             |                             |                             |
| Total effect                   | -0.0314 (-0.0545, -0.0080)* | -0.0130 (-0.0305, -0.0052)* | -0.0314 (-0.0545, -0.0080)* | -0.0130 (-0.0305, -0.0052)* |
| Indirect effect-path <i>ab</i> | 0.0000 (-0.0025, 0.0025)    | 0.0002 (-0.0021, 0.0028)    | -0.0001 (-0.0020, 0.0009)   | 0.0000 (-0.0010, 0.0005)    |
| Path <i>a</i>                  | 0.0000 (-0.0072, 0.0071)    | 0.0006 (-0.0064, 0.0076)    | 0.0015 (-0.0019, 0.0050)    | 0.0002 (-0.0028, 0.0031)    |
| Path <i>b</i>                  | 0.3066 (0.0797, 0.5334)*    | 0.3240 (0.1671, 0.4809)*    | -0.0502 (-0.5506, 0.4502)   | -0.0982 (-0.4649, 0.2685)   |
| Direct effect-path c'          | -0.0319 (-0.0533, -0.0106)* | -0.0134 (-0.0319, 0.0050)   | -0.0313 (-0.0525, -0.0101)* | -0.0129 (-0.0312, 0.0053)   |
| PE*                            | —                           | —                           | —                           | —                           |
| <b>25(OH)D<sub>2</sub></b>     |                             |                             |                             |                             |
| Total effect                   | -0.1951 (-0.2734, -0.1372)* | -0.1643 (-0.2211, -0.1153)* | -0.1951 (-0.2734, -0.1372)* | -0.1643 (-0.2211, -0.1153)* |
| Indirect effect-path <i>ab</i> | -0.0046 (-0.0132, -0.0001)* | -0.0072 (-0.0148, -0.0021)* | -0.0001 (-0.0035, 0.0018)   | 0.0002 (-0.0009, 0.0036)    |
| Path <i>a</i>                  | -0.0181 (-0.0334, -0.0027)* | -0.0253 (-0.0412, -0.0094)* | 0.0022 (-0.0051, 0.0095)    | -0.0016 (-0.0094, 0.0061)   |
| Path <i>b</i>                  | 0.2563 (0.0224, 0.4903)*    | 0.2835 (0.1229, 0.4441)*    | -0.0292 (-0.5484, 0.4899)   | -0.1303 (-0.5076, 0.2471)   |

|                                |                             |                             |                             |                             |
|--------------------------------|-----------------------------|-----------------------------|-----------------------------|-----------------------------|
| Direct effect-path c'          | -0.1921 (-0.2527, -0.1315)* | -0.1579 (-0.2065, -0.1093)* | -0.1950 (-0.2555, -0.1345)* | -0.1647 (-0.2133, -0.1162)* |
| PE*                            | 2.36%                       | 4.38%                       | —                           | —                           |
| <b>25(OH)D</b>                 |                             |                             |                             |                             |
| Total effect                   | -0.0493 (-0.0727, -0.0314)* | -0.0312 (-0.0486, -0.0157)* | -0.0493 (-0.0727, -0.0314)* | -0.0312 (-0.0486, -0.0157)* |
| Indirect effect-path <i>ab</i> | -0.0009 (-0.0037, 0.0008)   | -0.0010 (-0.0035, 0.0008)   | 0.0000 (-0.0016, 0.0009)    | 0.0000 (-0.0005, 0.0008)    |
| Path <i>a</i>                  | -0.0029 (-0.0091, 0.0033)   | -0.0031 (-0.0091, 0.0029)   | 0.0015 (-0.0015, 0.0044)    | -0.0001 (-0.0027, 0.0025)   |
| Path <i>b</i>                  | 0.2967 (0.0669, 0.5265)*    | 0.3188 (0.1608, 0.4767)*    | -0.0284 (-0.5370, 0.4801)   | -0.1013 (-0.4704, 0.2678)   |
| Direct effect-path c'          | -0.0493 (-0.0686, -0.0301)* | -0.0307 (-0.0471, -0.0144)* | -0.0493 (-0.0684, -0.0302)* | -0.0312 (-0.0474, -0.0150)* |
| PE*                            | —                           | —                           | —                           | —                           |
| <b>T2DM</b>                    |                             |                             |                             |                             |
| <b>25(OH)D<sub>3</sub></b>     |                             |                             |                             |                             |
| Total effect                   | -0.0192 (-0.0417, 0.0040)   | -0.0019 (-0.0204, 0.0174)   | -0.0192 (-0.0417, 0.0040)   | -0.0019 (-0.0204, 0.0174)   |
| Indirect effect-path <i>ab</i> | -0.0003 (-0.0029, 0.0009)   | -0.0009 (-0.0035, 0.0002)   | -0.0045 (-0.0099, -0.0010)* | -0.0004 (-0.0028, 0.0016)   |
| Path <i>a</i>                  | 0.0016 (-0.0060, 0.0091)    | -0.0088 (-0.0167, -0.0010)* | 0.0042 (0.0010, 0.0074)*    | 0.0007 (-0.0023, 0.0036)    |
| Path <i>b</i>                  | -0.1860 (-0.4037, 0.0317)   | 0.1073 (-0.0426, 0.2572)    | -1.0722 (-1.6477, -0.4966)* | -0.6637 (-1.0647, -0.2628)* |
| Direct effect-path c'          | -0.0190 (-0.0413, 0.0033)   | -0.0009 (-0.0203, 0.0185)   | -0.0152 (-0.0378, 0.0074)   | -0.0017 (-0.0211, 0.0178)   |
| PE*                            | —                           | —                           | —                           | —                           |
| <b>25(OH)D<sub>2</sub></b>     |                             |                             |                             |                             |
| Total effect                   | -0.2017 (-0.2960, -0.1324)* | -0.1786 (-0.2559, -0.1214)* | -0.2017 (-0.2960, -0.1324)* | -0.1786 (-0.2559, -0.1214)* |
| Indirect effect-path <i>ab</i> | 0.0034 (0.0000, 0.0106)*    | -0.0008 (-0.0048, 0.0006)   | -0.0066 (-0.0178, -0.0001)* | -0.0032 (-0.0101, 0.0010)   |
| Path <i>a</i>                  | -0.0140 (-0.0294, 0.0013)   | -0.0082 (-0.0243, 0.0080)   | 0.0069 (-0.0001, 0.0138)    | 0.0048 (-0.0026, 0.0123)    |
| Path <i>b</i>                  | -0.2447 (-0.4727, -0.0168)* | 0.0990 (-0.0543, 0.2523)    | -0.9651 (-1.5603, -0.3699)* | -0.6512 (-1.0659, -0.2365)* |
| Direct effect-path c'          | -0.2063 (-0.2716, -0.1410)* | -0.1781 (-0.2299, -0.1263)* | .                           | -0.1780 (-0.2299, -0.1261)* |

|                                |                             |                             |                             |                             |
|--------------------------------|-----------------------------|-----------------------------|-----------------------------|-----------------------------|
| PE*                            | —                           | —                           | —                           | —                           |
| <b>25(OH)D</b>                 |                             |                             |                             |                             |
| Total effect                   | -0.0399 (-0.0619, -0.0213)* | -0.0238 (-0.0418, -0.0061)* | -0.0399 (-0.0619, -0.0213)* | -0.0238 (-0.0418, -0.0061)* |
| Indirect effect-path <i>ab</i> | 0.0002 (-0.0010, 0.0022)    | -0.0007 (-0.0028, 0.0003)   | -0.0040 (-0.0089, -0.0012)* | -0.0008 (-0.0031, 0.0007)   |
| Path <i>a</i>                  | -0.0012 (-0.0075, 0.0051)   | -0.0074 (-0.0139, -0.0010)* | 0.0041 (0.0014, 0.0068)*    | 0.0012 (-0.0013, 0.0036)    |
| Path <i>b</i>                  | -0.1968 (-0.4181, 0.0245)   | 0.0939 (-0.0565, 0.2443)    | -0.9941 (-1.5760, -0.4122)* | -0.6567 (-1.0598, -0.2537)* |
| Direct effect-path <i>c'</i>   | -0.0402 (-0.0596, -0.0207)* | -0.0231 (-0.0399, -0.0064)* | -0.0364 (-0.0560, -0.0167)* | -0.0234 (-0.0402, -0.0066)* |
| PE*                            | —                           | —                           | 10.03%                      | —                           |

PE\*=Indirect effect/Total effect. b Fully mediated. Adjusted for alcohol intake, smoking status, physical activity, average monthly individual income, level of education, BMI, SBP, PP, and family history of T2DM. \*P<0.05. Abbreviations: IFG, impaired fasting glucose; T2DM, type 2 diabetes mellitus; 95%CI: 95% confidence interval.

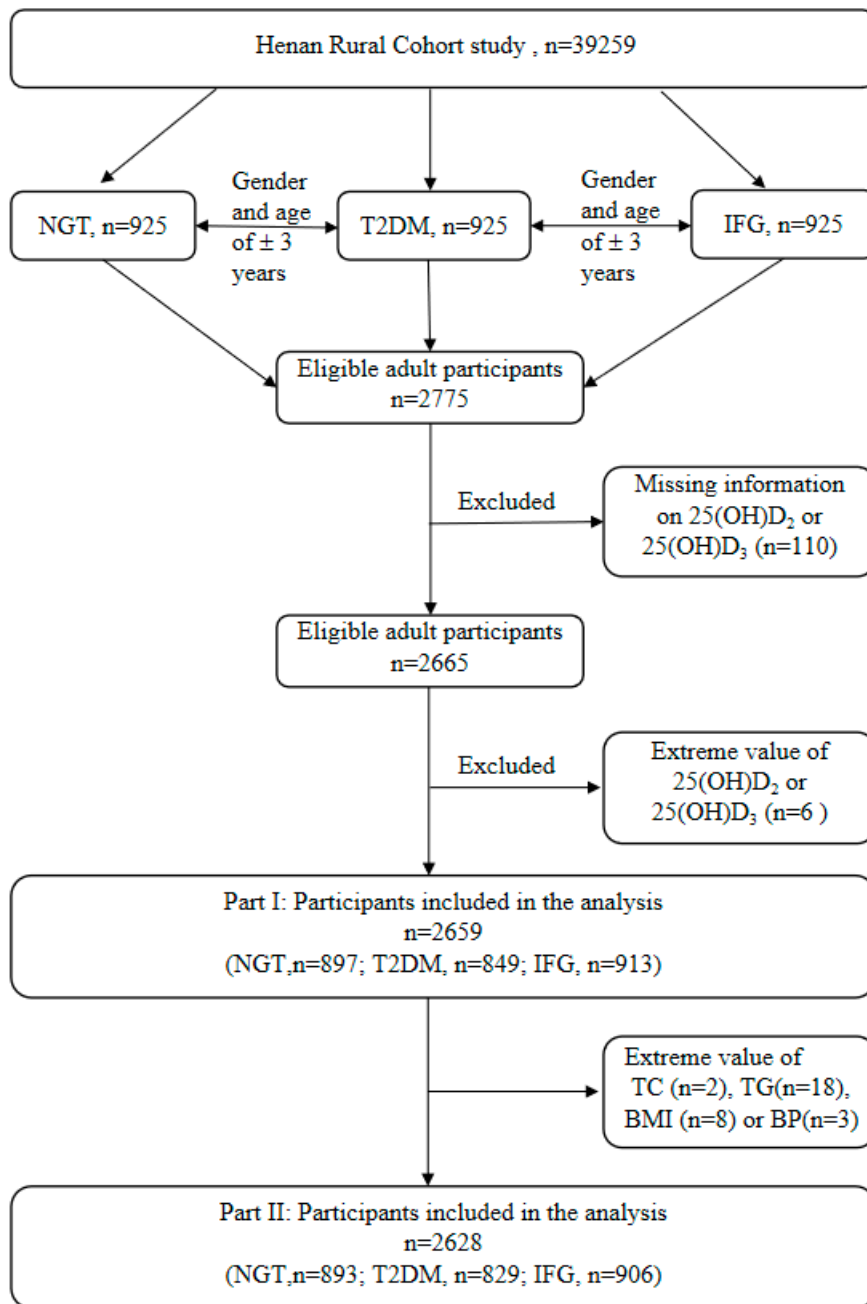

**Supplement Fig. 1** The flowchart of the inclusion and exclusion of participants.

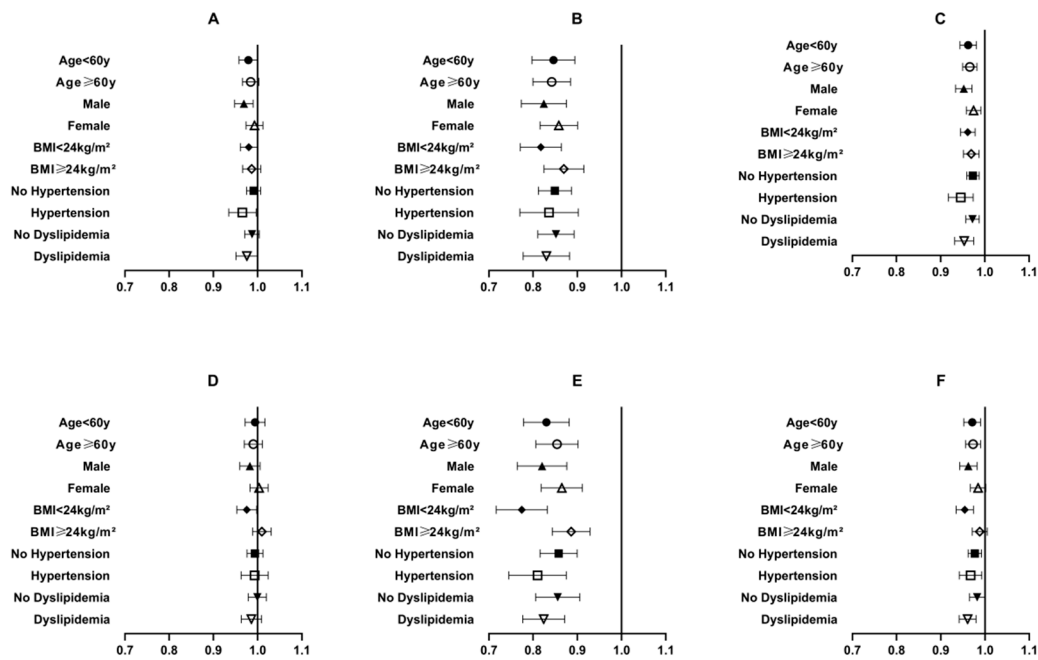

**Supplement Fig. 2** The associations of 25(OH)D<sub>3</sub>, 25(OH)D<sub>2</sub> and total 25(OH)D on IFG and T2DM in subgroups. *ORs* and *95% CIs* for stratification analysis by age (< 60 years or ≥ 60 years), gender (male or female), BMI (< 24 kg/m<sup>2</sup> or ≥ 24 kg/m<sup>2</sup>), hypertension (no or yes), dyslipidemia (no or yes) for 25(OH)D<sub>3</sub>, 25(OH)D<sub>2</sub>, total 25(OH)D on IFG and T2DM compared with NGT, respectively. “A”, “B”, “C” represent the associations of 25(OH)D<sub>3</sub>, 25(OH)D<sub>2</sub> and total 25(OH)D on IFG; “D”, “E”, “F” represent the associations of 25(OH)D<sub>3</sub>, 25(OH)D<sub>2</sub> and total 25(OH)D on T2DM; adjusted for smoking status, alcohol intake, physical activity, average monthly individual income, level of education, SBP, PP, TC, TG, HDL-C, LDL-C and family history of T2DM.
